# Supplementary figures and images for: 3D bio-printed biphasic scaffolds with dual modification of silk fibroin for the integrated repair of osteochondral defects
Source: Royal Society of Chemistry journal article supplement (doi:10.1039/d1bm00535a), 2021-01-01

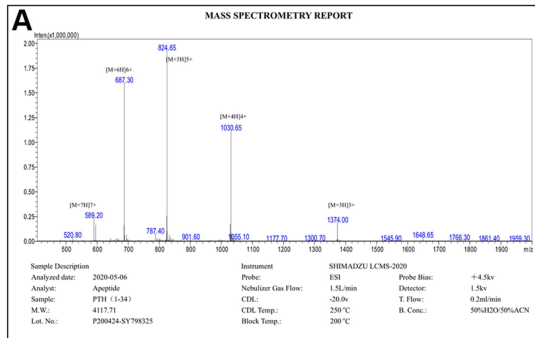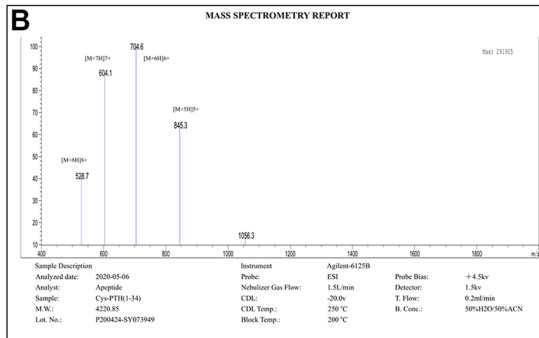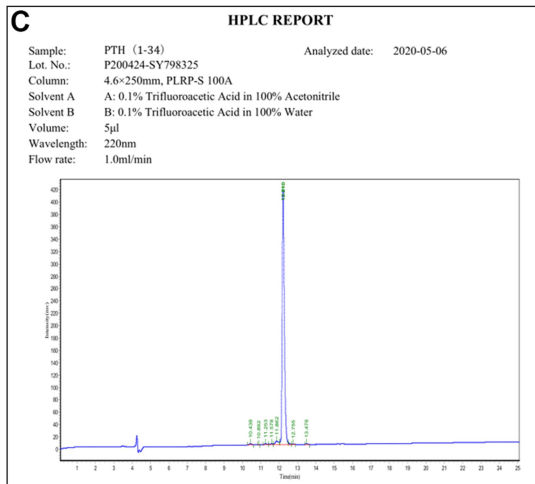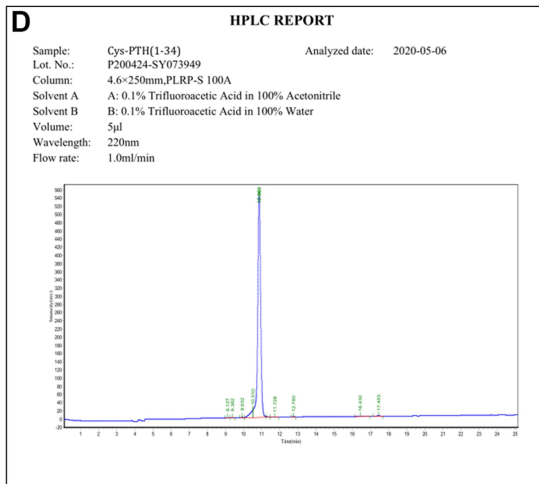

Supplement: d1bm00535a2.pdf [file d1bm00535a2.pdf]

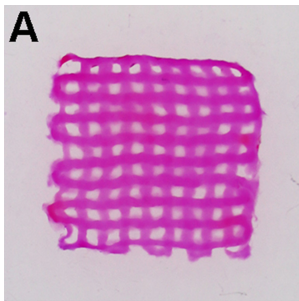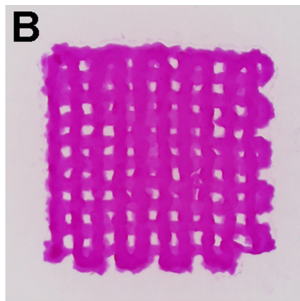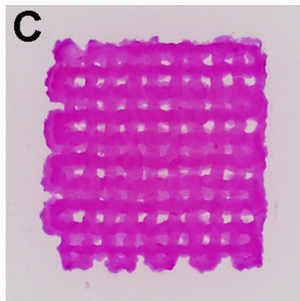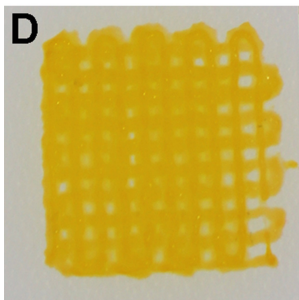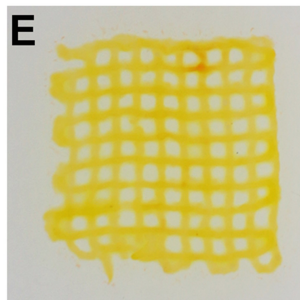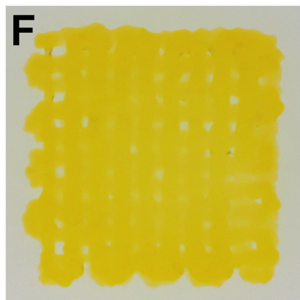

Supplement: d1bm00535a5.pdf [file d1bm00535a5.pdf]
